# Supplementary material for: The neuropeptide calcitonin gene-related peptide alpha is essential for bone healing
Source: PubMed Central journal article supplement (PMC7452713; doi:10.1016/j.ebiom.2020.102970), 2020-08-24

# Supplementary Figure 1

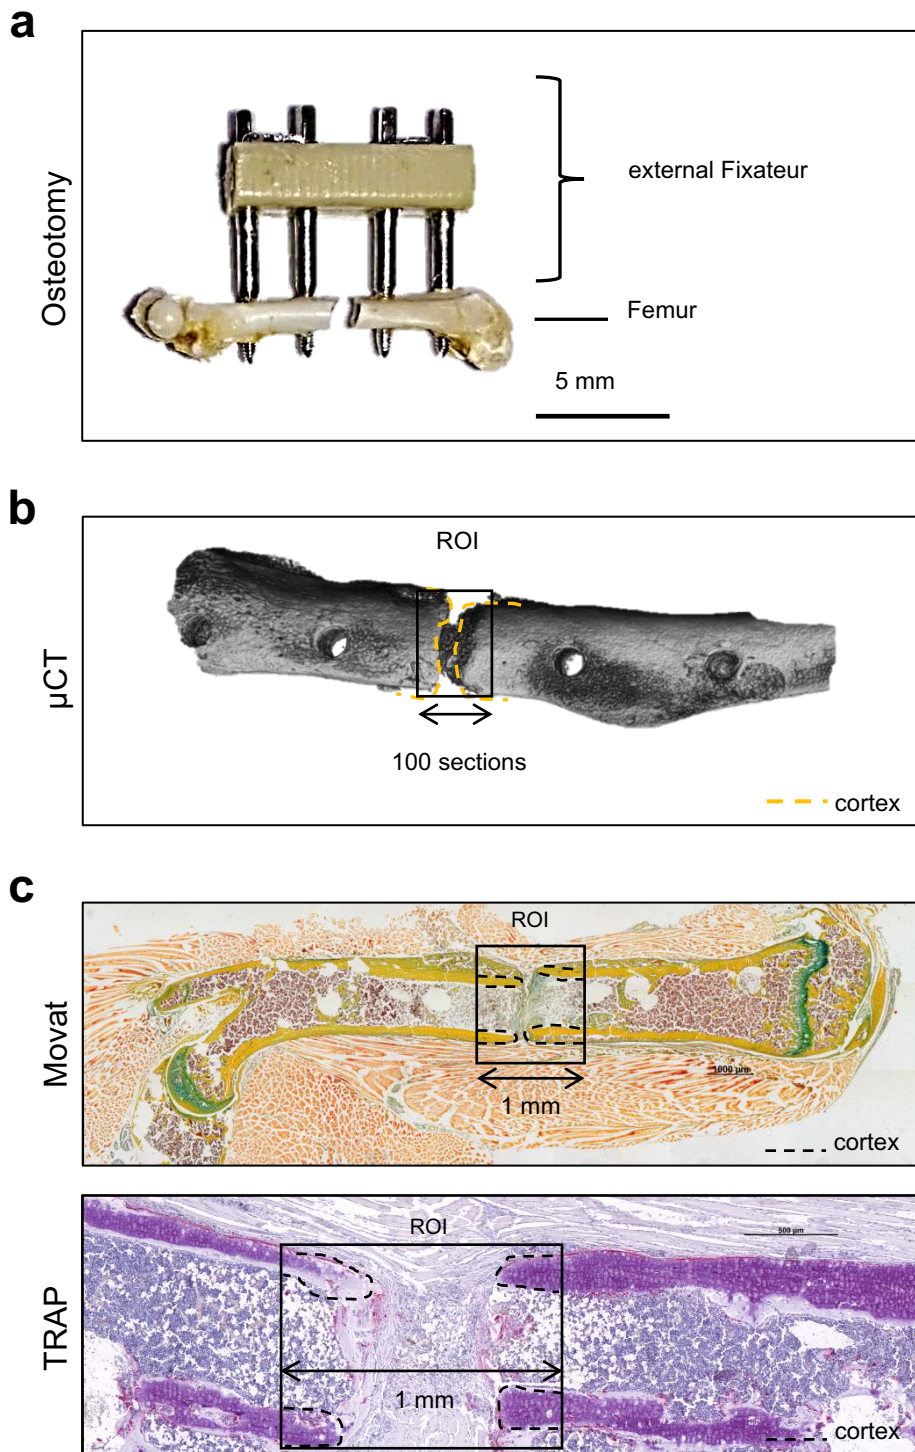

Supplement: mmc1.pdf [file mmc1.pdf]
